# Supplementary material for: Assessing the impact of anthropogenic pollution on isoprene-derived secondary organic aerosol formation in PM2.5 collected from the Birmingham, Alabama, ground site during the 2013 Southern Oxidant and Aerosol Study
Source: PubMed Central journal article supplement (PMC6145830; doi:10.5194/acp-16-4897-2016), 2017
Supplement: NIHMS982682-supplement-Supp.pdf [file NIHMS982682-supplement-Supp.pdf]

Supplement of Atmos. Chem. Phys., 16, 4897–4914, 2016  
<http://www.atmos-chem-phys.net/16/4897/2016/>  
doi:10.5194/acp-16-4897-2016-supplement  
© Author(s) 2016. CC Attribution 3.0 License.

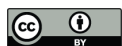

Atmospheric  
Chemistry  
and Physics  
Open Access  
EGU

*Supplement of*

**Assessing the impact of anthropogenic pollution on isoprene-derived secondary organic aerosol formation in PM<sub>2.5</sub> collected from the Birmingham, Alabama, ground site during the 2013 Southern Oxidant and Aerosol Study**

**Weruka Rattanavaraha et al.**

*Correspondence to:* J. D. Surratt (surratt@unc.edu)

The copyright of individual parts of the supplement might differ from the CC-BY 3.0 licence.

1 **Table S1.** Instrumentation and time resolution of collocated measurements at BHM.

2

| <b>Category</b>        | <b>Variable</b>                           | <b>Analyzer/Sensor</b>             | <b>Time Resolution<br/>(Interval, average)<br/>(minutes)</b> |
|------------------------|-------------------------------------------|------------------------------------|--------------------------------------------------------------|
| <b>Meteorology</b>     | Wind Speed/Direction                      | RMYoung 81000 sonic                | 5, 60                                                        |
|                        | T/RH/BP                                   | Paroscientific Met4A               | 5, 60                                                        |
|                        | T/RH                                      | Vaisala                            | 5, 60                                                        |
|                        | PAR                                       | Licor                              | 5, 60                                                        |
|                        | Precipitation                             | ETI-NOAH IV                        | 5, 60                                                        |
|                        | Aerosol/cloud layers                      | JenOptik CHM 15k ceilometer        | 5, 60                                                        |
|                        | Surface wetness                           | Vaisala (SWS2)                     | 5, 60                                                        |
| <b>Trace Gases</b>     | O <sub>3</sub>                            | Thermo 49i                         | 5, 60                                                        |
|                        | CO                                        | Thermo 48i                         | 5, 60                                                        |
|                        | SO <sub>2</sub>                           | Thermo 43i                         | 5, 60                                                        |
|                        | NO                                        | Thermo 42i                         | 5, 60                                                        |
|                        | NO <sub>2</sub>                           | Photolysis/Thermo 49i              | 5, 60                                                        |
|                        | HNO <sub>3</sub>                          | Continuous denuder diff/Thermo 42i | 5, 60                                                        |
|                        | NO <sub>y</sub>                           | Cat. reduction/Thermo 42i          | 5, 60                                                        |
|                        | NH <sub>3</sub>                           | Continuous denuder diff/Thermo 42i | 5, 60                                                        |
| <b>Continuous PM</b>   | PM <sub>2.5</sub> Mass                    | TEOM                               | 60                                                           |
|                        | PM <sub>coarse</sub> Mass                 | Dichotomous TEOM                   | 60                                                           |
|                        | PM <sub>2.5</sub> SO <sub>4</sub>         | Cat. reduction/Thermo 43i          | 60                                                           |
|                        | PM <sub>2.5</sub> NO <sub>3</sub>         | Cat. reduction/Thermo 42i          | 60                                                           |
|                        | PM <sub>2.5</sub> NH <sub>4</sub>         | Cat. oxidation/Thermo 42i          | 60                                                           |
|                        | PM <sub>2.5</sub> TC/EC                   | Sunset                             | 60                                                           |
|                        | Dry Babs (880 nm)                         | Radiance Research M903             | 5, 60                                                        |
|                        | Dry Bsp (530 nm)                          | Magee 2ch. Aeth                    | 5, 60                                                        |
|                        | Ambient Bsp (530 nm)                      | Optec NGN-2a                       | 5, 60                                                        |
| <b>Filter-Based PM</b> | PM <sub>2.5</sub> Mass                    | gravimetry                         | 1440, daily                                                  |
|                        | PM <sub>2.5</sub> ions                    | IC                                 | 1440, 1 in 3 days                                            |
|                        | PM <sub>2.5</sub> major/minor elements    | XRF                                | 1440, daily                                                  |
|                        | PM <sub>2.5</sub> water-soluble metals    | ICPMS                              | 1440, 1 in 3 days                                            |
|                        | PM <sub>2.5</sub> OC/EC                   | TOR                                | 1440, 1 in 3 days                                            |
|                        | PM <sub>coarse</sub> Mass                 | gravimetry                         | 1440, 1 in 3 days                                            |
|                        | PM <sub>coarse</sub> ions                 | IC                                 | 1440, 1 in 3 days                                            |
|                        | PM <sub>coarse</sub> major/minor elements | XRF                                | 1440, 1 in 3 days                                            |
|                        | PM <sub>coarse</sub> water-soluble metals | ICPMS                              | 1440, 1 in 3 days                                            |
| <b>Hi-Vol Based PM</b> | PM <sub>2.5</sub> OC/EC                   | TOR                                | 23-hr, daily                                                 |
|                        | PM <sub>2.5</sub> ions                    | IC                                 | 23-hr, daily                                                 |
|                        | PM <sub>2.5</sub> (other)                 | Various                            | 11-hr, daily                                                 |

3 **Table S2.** Correlation ( $r^2$ ) of isoprene-derived SOA tracers and collocated measurements during  
 4 regular day sampling (8 am – 7 pm).

| <b>SOA tracers</b>                                                            | <b>CO</b>   | <b>O<sub>3</sub></b> | <b>NO<sub>x</sub></b> | <b>NO<sub>y</sub></b> | <b>SO<sub>2</sub></b> | <b>NH<sub>3</sub></b> | <b>SO<sub>4</sub></b> | <b>NO<sub>3</sub></b> | <b>NH<sub>4</sub></b> | <b>OC</b>   | <b>WSOC</b> | <b>pH</b>   |
|-------------------------------------------------------------------------------|-------------|----------------------|-----------------------|-----------------------|-----------------------|-----------------------|-----------------------|-----------------------|-----------------------|-------------|-------------|-------------|
| <b>MAE/HMML-derived SOA tracers</b>                                           | <b>0.31</b> | <b>0.72</b>          | <b>0.04</b>           | <b>0.00</b>           | <b>0.20</b>           | <b>0.34</b>           | <b>0.51</b>           | <b>0.10</b>           | <b>0.53</b>           | <b>0.44</b> | <b>0.48</b> | <b>0.01</b> |
| 2-methylglyceric acid                                                         | 0.14        | 0.44                 | 0.01                  | 0.00                  | 0.09                  | 0.15                  | 0.19                  | 0.03                  | 0.27                  | 0.09        | 0.12        | 0.00        |
| MAE-derived OS                                                                | 0.28        | 0.60                 | 0.04                  | 0.00                  | 0.14                  | 0.31                  | 0.66                  | 0.14                  | 0.56                  | 0.58        | 0.52        | 0.01        |
| <b>IEPOX-derived SOA tracers</b>                                              | <b>0.09</b> | <b>0.26</b>          | <b>0.01</b>           | <b>0.01</b>           | <b>0.08</b>           | <b>0.12</b>           | <b>0.41</b>           | <b>0.04</b>           | <b>0.41</b>           | <b>0.31</b> | <b>0.32</b> | <b>0.01</b> |
| 2-methylerythritol                                                            | 0.04        | 0.30                 | 0.03                  | 0.00                  | 0.05                  | 0.04                  | 0.31                  | 0.00                  | 0.31                  | 0.24        | 0.30        | 0.01        |
| 2-methylthreitol                                                              | 0.02        | 0.20                 | 0.02                  | 0.00                  | 0.06                  | 0.03                  | 0.21                  | 0.00                  | 0.23                  | 0.13        | 0.19        | 0.00        |
| (E)-2-methylbut-3-ene-1,2,4-triol                                             | 0.05        | 0.24                 | 0.02                  | 0.00                  | 0.03                  | 0.05                  | 0.33                  | 0.02                  | 0.32                  | 0.22        | 0.27        | 0.00        |
| (Z)-2-methylbut-3-ene-1,2,4-triol                                             | 0.10        | 0.11                 | 0.00                  | 0.01                  | 0.09                  | 0.17                  | 0.34                  | 0.10                  | 0.32                  | 0.24        | 0.16        | 0.01        |
| 2-methylbut-3-ene-1,2,3-triol                                                 | 0.11        | 0.11                 | 0.00                  | 0.01                  | 0.09                  | 0.18                  | 0.36                  | 0.10                  | 0.34                  | 0.25        | 0.17        | 0.01        |
| IEPOX-derived OS                                                              | 0.17        | 0.41                 | 0.01                  | 0.01                  | 0.08                  | 0.19                  | 0.47                  | 0.07                  | 0.50                  | 0.53        | 0.59        | 0.01        |
| IEPOX dimer                                                                   | 0.00        | 0.00                 | 0.00                  | 0.00                  | 0.00                  | 0.00                  | 0.00                  | 0.00                  | 0.00                  | 0.00        | 0.00        | 0.00        |
| <b>Other isoprene SOA tracers</b>                                             |             |                      |                       |                       |                       |                       |                       |                       |                       |             |             |             |
| <b>GA sulfate</b>                                                             |             |                      |                       |                       |                       |                       |                       |                       |                       |             |             |             |
| C <sub>2</sub> H <sub>3</sub> O <sub>6</sub> S <sup>-</sup>                   | 0.22        | 0.20                 | 0.00                  | 0.00                  | 0.07                  | 0.19                  | 0.49                  | 0.20                  | 0.39                  | 0.33        | 0.21        | 0.01        |
| <b>Methylglyoxal-derived OS</b>                                               |             |                      |                       |                       |                       |                       |                       |                       |                       |             |             |             |
| C <sub>3</sub> H <sub>5</sub> O <sub>6</sub> S <sup>-</sup>                   | 0.25        | 0.40                 | 0.01                  | 0.01                  | 0.11                  | 0.11                  | 0.57                  | 0.05                  | 0.46                  | 0.41        | 0.47        | 0.01        |
| <b>Isoprene-derived OSs</b>                                                   |             |                      |                       |                       |                       |                       |                       |                       |                       |             |             |             |
| C <sub>5</sub> H <sub>7</sub> O <sub>7</sub> S <sup>-</sup>                   | 0.13        | 0.34                 | 0.01                  | 0.01                  | 0.02                  | 0.17                  | 0.35                  | 0.11                  | 0.40                  | 0.21        | 0.28        | 0.00        |
| C <sub>5</sub> H <sub>10</sub> NO <sub>9</sub> S <sup>-</sup>                 | 0.02        | 0.37                 | 0.12                  | 0.06                  | 0.00                  | 0.01                  | 0.48                  | 0.12                  | 0.38                  | 0.18        | 0.12        | 0.11        |
| C <sub>5</sub> H <sub>9</sub> N <sub>2</sub> O <sub>11</sub> S <sup>-</sup> * | 0.25        | 0.56                 | 0.48                  | 0.40                  | 0.15                  | 0.40                  | 0.52                  | 0.28                  | 0.24                  | 0.57        | 0.46        | 0.00        |
| <b>Hydroxyacetone-derived OS</b>                                              |             |                      |                       |                       |                       |                       |                       |                       |                       |             |             |             |
| C <sub>2</sub> H <sub>3</sub> O <sub>5</sub> S <sup>-</sup>                   | 0.42        | 0.73                 | 0.06                  | 0.16                  | 0.00                  | 0.18                  | 0.55                  | 0.23                  | 0.71                  | 0.57        | 0.66        | 0.00        |
| <b>Other tracer</b>                                                           |             |                      |                       |                       |                       |                       |                       |                       |                       |             |             |             |
| Levogluconan                                                                  | 0.26        | 0.34                 | 0.00                  | 0.00                  | 0.09                  | 0.21                  | 0.44                  | 0.10                  | 0.47                  | 0.22        | 0.25        | 0.01        |

5 \* Found only in 6 of 120 filters

6 The correlations in this table are positive.

7 **Table S3.** Correlation ( $r^2$ ) of isoprene-derived SOA tracers and collocated measurements during  
8 intensive 1 sampling (8 am – 11 am).

| <b>SOA tracers</b>                                                            | <b>CO</b>   | <b>O<sub>3</sub></b> | <b>NO<sub>x</sub></b> | <b>NO<sub>y</sub></b> | <b>SO<sub>2</sub></b> | <b>NH<sub>3</sub></b> | <b>SO<sub>4</sub></b> | <b>NO<sub>3</sub></b> | <b>NH<sub>4</sub></b> | <b>OC</b>   | <b>WSOC</b> | <b>pH</b>   |
|-------------------------------------------------------------------------------|-------------|----------------------|-----------------------|-----------------------|-----------------------|-----------------------|-----------------------|-----------------------|-----------------------|-------------|-------------|-------------|
| <b>MAE/HMML-derived SOA tracers</b>                                           | <b>0.00</b> | <b>0.20</b>          | <b>0.04</b>           | <b>0.16</b>           | <b>0.01</b>           | <b>0.07</b>           | <b>0.35</b>           | <b>0.25</b>           | <b>0.46</b>           | <b>0.47</b> | <b>0.16</b> | <b>0.18</b> |
| 2-methylglyceric acid                                                         | 0.03        | 0.22                 | 0.05                  | 0.10                  | 0.00                  | 0.07                  | 0.00                  | 0.43                  | 0.11                  | 0.46        | 0.07        | 0.08        |
| MAE-derived OS                                                                | 0.01        | 0.09                 | 0.02                  | 0.12                  | 0.01                  | 0.03                  | 0.72                  | 0.06                  | 0.62                  | 0.26        | 0.08        | 0.18        |
| <b>IEPOX-derived SOA tracers</b>                                              | <b>0.11</b> | <b>0.04</b>          | <b>0.05</b>           | <b>0.00</b>           | <b>0.06</b>           | <b>0.26</b>           | <b>0.30</b>           | <b>0.00</b>           | <b>0.16</b>           | <b>0.04</b> | <b>0.02</b> | <b>0.03</b> |
| 2-methylerythritol                                                            | 0.15        | 0.01                 | 0.02                  | 0.00                  | 0.16                  | 0.52                  | 0.22                  | 0.03                  | 0.18                  | 0.00        | 0.00        | 0.15        |
| 2-methylthreitol                                                              | 0.04        | 0.00                 | 0.00                  | 0.00                  | 0.10                  | 0.19                  | 0.13                  | 0.02                  | 0.16                  | 0.00        | 0.02        | 0.13        |
| (E)-2-methylbut-3-ene-1,2,4-triol                                             | 0.12        | 0.03                 | 0.06                  | 0.01                  | 0.01                  | 0.27                  | 0.23                  | 0.00                  | 0.09                  | 0.11        | 0.05        | 0.00        |
| (Z)-2-methylbut-3-ene-1,2,4-triol                                             | 0.13        | 0.02                 | 0.05                  | 0.01                  | 0.03                  | 0.32                  | 0.28                  | 0.00                  | 0.08                  | 0.09        | 0.05        | 0.00        |
| 2-methylbut-3-ene-1,2,3-triol                                                 | 0.07        | 0.02                 | 0.02                  | 0.00                  | 0.02                  | 0.26                  | 0.22                  | 0.01                  | 0.03                  | 0.04        | 0.28        | 0.01        |
| IEPOX-derived OS                                                              | 0.09        | 0.07                 | 0.07                  | 0.00                  | 0.05                  | 0.19                  | 0.30                  | 0.00                  | 0.17                  | 0.04        | 0.00        | 0.02        |
| IEPOX dimer                                                                   | 0.00        | 0.00                 | 0.00                  | 0.00                  | 0.00                  | 0.00                  | 0.00                  | 0.00                  | 0.00                  | 0.00        | 0.00        | 0.00        |
| <b>Other isoprene SOA tracers</b>                                             |             |                      |                       |                       |                       |                       |                       |                       |                       |             |             |             |
| <b>GA sulfate</b>                                                             |             |                      |                       |                       |                       |                       |                       |                       |                       |             |             |             |
| C <sub>2</sub> H <sub>3</sub> O <sub>6</sub> S <sup>-</sup>                   | 0.00        | 0.19                 | 0.03                  | 0.01                  | 0.01                  | 0.03                  | 0.37                  | 0.02                  | 0.44                  | 0.25        | 0.11        | 0.00        |
| Methylglyoxal-derived OS                                                      |             |                      |                       |                       |                       |                       |                       |                       |                       |             |             |             |
| C <sub>3</sub> H <sub>5</sub> O <sub>6</sub> S <sup>-</sup>                   | 0.05        | 0.05                 | 0.18                  | 0.28                  | 0.02                  | 0.00                  | 0.01                  | 0.11                  | 0.24                  | 0.09        | 0.56        | 0.03        |
| <b>Isoprene-derived OSs</b>                                                   |             |                      |                       |                       |                       |                       |                       |                       |                       |             |             |             |
| C <sub>5</sub> H <sub>7</sub> O <sub>7</sub> S <sup>-</sup>                   | 0.09        | 0.15                 | 0.00                  | 0.20                  | 0.05                  | 0.02                  | 0.36                  | 0.12                  | 0.25                  | 0.40        | 0.00        | 0.02        |
| C <sub>5</sub> H <sub>10</sub> NO <sub>9</sub> S <sup>-</sup>                 | 0.00        | 0.05                 | 0.02                  | 0.06                  | 0.06                  | 0.04                  | 0.38                  | 0.00                  | 0.23                  | 0.17        | 0.18        | 0.37        |
| C <sub>5</sub> H <sub>9</sub> N <sub>2</sub> O <sub>11</sub> S <sup>-</sup> * | 0.00        | 0.00                 | 0.00                  | 0.00                  | 0.00                  | 0.21                  | 0.00                  | 0.00                  | 0.00                  | 0.00        | 0.00        | 0.00        |
| <b>Hydroxyacetone-derived OS</b>                                              |             |                      |                       |                       |                       |                       |                       |                       |                       |             |             |             |
| C <sub>2</sub> H <sub>3</sub> O <sub>5</sub> S <sup>-</sup>                   | 0.25        | 0.67                 | 0.71                  | 0.65                  | 0.21                  | 0.21                  | 0.03                  | 0.26                  | 0.12                  | 0.50        | 0.00        | 0.70        |
| <b>Other tracer</b>                                                           |             |                      |                       |                       |                       |                       |                       |                       |                       |             |             |             |
| Levogluconan                                                                  | 0.03        | 0.07                 | 0.02                  | 0.00                  | 0.07                  | 0.07                  | 0.08                  | 0.11                  | 0.01                  | 0.03        | 0.02        | 0.24        |

\* Found only in 6 of 120 filters

The correlations in this table are positive.

9  
10

11 **Table S4.** Correlation ( $r^2$ ) of isoprene-derived SOA tracers and collocated measurements during  
 12 intensive 2 sampling (12 pm – 3 pm).

| <b>SOA tracers</b>                                                            | <b>CO</b>   | <b>O<sub>3</sub></b> | <b>NO<sub>x</sub></b> | <b>NO<sub>y</sub></b> | <b>SO<sub>2</sub></b> | <b>NH<sub>3</sub></b> | <b>SO<sub>4</sub></b> | <b>NO<sub>3</sub></b> | <b>NH<sub>4</sub></b> | <b>OC</b>   | <b>WSOC</b> | <b>pH</b>   |
|-------------------------------------------------------------------------------|-------------|----------------------|-----------------------|-----------------------|-----------------------|-----------------------|-----------------------|-----------------------|-----------------------|-------------|-------------|-------------|
| <b>MAE/HMML-derived SOA tracers</b>                                           | <b>0.13</b> | <b>0.42</b>          | <b>0.0</b>            | <b>0.12</b>           | <b>0.04</b>           | <b>0.01</b>           | <b>0.14</b>           | <b>0.05</b>           | <b>0.29</b>           | <b>0.55</b> | <b>0.19</b> | <b>0.00</b> |
| 2-methylglyceric acid                                                         | 0.01        | 0.47                 | 0.25                  | 0.32                  | 0.00                  | 0.04                  | 0.00                  | 0.05                  | 0.04                  | 0.17        | 0.07        | 0.05        |
| MAE-derived OS                                                                | 0.15        | 0.20                 | 0.04                  | 0.01                  | 0.06                  | 0.00                  | 0.18                  | 0.15                  | 0.31                  | 0.49        | 0.24        | 0.03        |
| <b>IEPOX-derived SOA tracers</b>                                              | <b>0.22</b> | <b>0.00</b>          | <b>0.04</b>           | <b>0.08</b>           | <b>0.00</b>           | <b>0.21</b>           | <b>0.34</b>           | <b>0.32</b>           | <b>0.37</b>           | <b>0.46</b> | <b>0.81</b> | <b>0.02</b> |
| 2-methylerythritol                                                            | 0.41        | 0.00                 | 0.13                  | 0.14                  | 0.01                  | 0.16                  | 0.48                  | 0.24                  | 0.50                  | 0.42        | 0.77        | 0.01        |
| 2-methylthreitol                                                              | 0.29        | 0.00                 | 0.03                  | 0.07                  | 0.00                  | 0.07                  | 0.22                  | 0.41                  | 0.39                  | 0.32        | 0.70        | 0.02        |
| (E)-2-methylbut-3-ene-1,2,4-triol                                             | 0.17        | 0.00                 | 0.04                  | 0.07                  | 0.01                  | 0.17                  | 0.30                  | 0.31                  | 0.29                  | 0.44        | 0.61        | 0.02        |
| (Z)-2-methylbut-3-ene-1,2,4-triol                                             | 0.21        | 0.00                 | 0.05                  | 0.07                  | 0.01                  | 0.17                  | 0.33                  | 0.29                  | 0.31                  | 0.45        | 0.64        | 0.01        |
| 2-methylbut-3-ene-1,2,3-triol                                                 | 0.03        | 0.02                 | 0.00                  | 0.02                  | 0.03                  | 0.07                  | 0.13                  | 0.21                  | 0.06                  | 0.09        | 0.62        | 0.03        |
| IEPOX-derived OS                                                              | 0.19        | 0.02                 | 0.11                  | 0.21                  | 0.00                  | 0.32                  | 0.43                  | 0.16                  | 0.39                  | 0.52        | 0.58        | 0.00        |
| IEPOX dimer                                                                   | 0.00        | 0.00                 | 0.00                  | 0.00                  | 0.00                  | 0.00                  | 0.00                  | 0.00                  | 0.00                  | 0.00        | 0.00        | 0.00        |
| <b>Other isoprene SOA tracers</b>                                             |             |                      |                       |                       |                       |                       |                       |                       |                       |             |             |             |
| <b>GA sulfate</b>                                                             |             |                      |                       |                       |                       |                       |                       |                       |                       |             |             |             |
| C <sub>2</sub> H <sub>3</sub> O <sub>6</sub> S <sup>-</sup>                   | 0.24        | 0.23                 | 0.00                  | 0.08                  | 0.00                  | 0.06                  | 0.32                  | 0.23                  | 0.46                  | 0.46        | 0.48        | 0.00        |
| Methylglyoxal-derived OS                                                      |             |                      |                       |                       |                       |                       |                       |                       |                       |             |             |             |
| C <sub>3</sub> H <sub>5</sub> O <sub>6</sub> S <sup>-</sup>                   | 0.27        | 0.28                 | 0.01                  | 0.02                  | 0.01                  | 0.06                  | 0.29                  | 0.00                  | 0.29                  | 0.33        | 0.43        | 0.03        |
| <b>Isoprene-derived OSs</b>                                                   |             |                      |                       |                       |                       |                       |                       |                       |                       |             |             |             |
| C <sub>5</sub> H <sub>7</sub> O <sub>7</sub> S <sup>-</sup>                   | 0.14        | 0.02                 | 0.06                  | 0.07                  | 0.03                  | 0.06                  | 0.16                  | 0.00                  | 0.18                  | 0.18        | 0.09        | 0.00        |
| C <sub>5</sub> H <sub>10</sub> NO <sub>9</sub> S <sup>-</sup>                 | 0.00        | 0.15                 | 0.07                  | 0.05                  | 0.21                  | 0.34                  | 0.03                  | 0.05                  | 0.00                  | 0.06        | 0.00        | 0.18        |
| C <sub>5</sub> H <sub>9</sub> N <sub>2</sub> O <sub>11</sub> S <sup>-</sup> * | 0.00        | 0.00                 | 0.00                  | 0.00                  | 0.00                  | 0.00                  | 0.00                  | 0.00                  | 0.00                  | 0.00        | 0.00        | 0.00        |
| <b>Hydroxyacetone-derived OS</b>                                              |             |                      |                       |                       |                       |                       |                       |                       |                       |             |             |             |
| C <sub>2</sub> H <sub>3</sub> O <sub>5</sub> S <sup>-</sup>                   | 0.09        | 0.40                 | 0.01                  | 0.01                  | 0.10                  | 0.05                  | 0.04                  | 0.07                  | 0.10                  | 0.07        | 0.62        | 0.01        |
| <b>Other tracer</b>                                                           |             |                      |                       |                       |                       |                       |                       |                       |                       |             |             |             |
| Levogluconan                                                                  | 0.03        | 0.00                 | 0.22                  | 0.13                  | 0.00                  | 0.01                  | 0.03                  | 0.17                  | 0.00                  | 0.02        | 0.00        | 0.07        |

13 \* Found only in 6 of 120 filters

14 The correlations in this table are positive.

15 **Table S5.** Correlation ( $r^2$ ) of isoprene-derived SOA tracers and collocated measurements during  
 16 intensive 3 sampling (4 pm – 7 pm).

| <b>SOA tracers</b>                                                            | <b>CO</b>   | <b>O<sub>3</sub></b> | <b>NO<sub>x</sub></b> | <b>NO<sub>y</sub></b> | <b>SO<sub>2</sub></b> | <b>NH<sub>3</sub></b> | <b>SO<sub>4</sub></b> | <b>NO<sub>3</sub></b> | <b>NH<sub>4</sub></b> | <b>OC</b>   | <b>WSOC</b> | <b>pH</b>   |
|-------------------------------------------------------------------------------|-------------|----------------------|-----------------------|-----------------------|-----------------------|-----------------------|-----------------------|-----------------------|-----------------------|-------------|-------------|-------------|
| <b>MAE/HMML-derived SOA tracers</b>                                           | <b>0.01</b> | <b>0.47</b>          | <b>0.45</b>           | <b>0.39</b>           | <b>0.47</b>           | <b>0.00</b>           | <b>0.19</b>           | <b>0.10</b>           | <b>0.12</b>           | <b>0.54</b> | <b>0.23</b> | <b>0.15</b> |
| 2-methylglyceric acid                                                         | 0.12        | 0.37                 | 0.03                  | 0.17                  | 0.25                  | 0.00                  | 0.00                  | 0.05                  | 0.02                  | 0.34        | 0.50        | 0.15        |
| MAE-derived OS                                                                | 0.00        | 0.37                 | 0.44                  | 0.39                  | 0.41                  | 0.01                  | 0.25                  | 0.09                  | 0.13                  | 0.45        | 0.04        | 0.10        |
| <b>IEPOX-derived SOA tracers</b>                                              | <b>0.10</b> | <b>0.15</b>          | <b>0.18</b>           | <b>0.14</b>           | <b>0.50</b>           | <b>0.17</b>           | <b>0.47</b>           | <b>0.00</b>           | <b>0.18</b>           | <b>0.31</b> | <b>0.24</b> | <b>0.03</b> |
| 2-methylerythritol                                                            | 0.03        | 0.34                 | 0.08                  | 0.04                  | 0.58                  | 0.12                  | 0.34                  | 0.01                  | 0.14                  | 0.42        | 0.22        | 0.00        |
| 2-methylthreitol                                                              | 0.04        | 0.32                 | 0.03                  | 0.01                  | 0.43                  | 0.17                  | 0.25                  | 0.03                  | 0.14                  | 0.54        | 0.21        | 0.01        |
| (E)-2-methylbut-3-ene-1,2,4-triol                                             | 0.00        | 0.21                 | 0.05                  | 0.02                  | 0.70                  | 0.13                  | 0.33                  | 0.00                  | 0.12                  | 0.38        | 0.01        | 0.02        |
| (Z)-2-methylbut-3-ene-1,2,4-triol                                             | 0.00        | 0.21                 | 0.09                  | 0.05                  | 0.77                  | 0.14                  | 0.41                  | 0.00                  | 0.13                  | 0.27        | 0.01        | 0.01        |
| 2-methylbut-3-ene-1,2,3-triol                                                 | 0.54        | 0.00                 | 0.12                  | 0.13                  | 0.00                  | 0.01                  | 0.18                  | 0.04                  | 0.06                  | 0.00        | 0.33        | 0.02        |
| IEPOX-derived OS                                                              | 0.15        | 0.10                 | 0.17                  | 0.12                  | 0.42                  | 0.16                  | 0.41                  | 0.00                  | 0.15                  | 0.24        | 0.29        | 0.03        |
| IEPOX dimer                                                                   | 0.00        | 0.00                 | 0.00                  | 0.00                  | 0.00                  | 0.00                  | 0.00                  | 0.00                  | 0.00                  | 0.00        | 0.00        | 0.00        |
| <b>Other isoprene SOA tracers</b>                                             |             |                      |                       |                       |                       |                       |                       |                       |                       |             |             |             |
| <b>GA sulfate</b>                                                             |             |                      |                       |                       |                       |                       |                       |                       |                       |             |             |             |
| C <sub>2</sub> H <sub>3</sub> O <sub>6</sub> S <sup>-</sup>                   | 0.20        | 0.28                 | 0.43                  | 0.32                  | 0.02                  | 0.00                  | 0.19                  | 0.16                  | 0.30                  | 0.55        | 0.01        | 0.21        |
| Methylglyoxal-derived OS                                                      |             |                      |                       |                       |                       |                       |                       |                       |                       |             |             |             |
| C <sub>3</sub> H <sub>5</sub> O <sub>6</sub> S <sup>-</sup>                   | 0.26        | 0.16                 | 0.01                  | 0.01                  | 0.10                  | 0.12                  | 0.57                  | 0.34                  | 0.60                  | 0.03        | 0.00        | 0.02        |
| <b>Isoprene-derived OSs</b>                                                   |             |                      |                       |                       |                       |                       |                       |                       |                       |             |             |             |
| C <sub>5</sub> H <sub>7</sub> O <sub>7</sub> S <sup>-</sup>                   | 0.06        | 0.18                 | 0.19                  | 0.13                  | 0.12                  | 0.14                  | 0.45                  | 0.02                  | 0.35                  | 0.55        | 0.02        | 0.00        |
| C <sub>5</sub> H <sub>10</sub> NO <sub>9</sub> S <sup>-</sup>                 | 0.06        | 0.45                 | 0.00                  | 0.03                  | 0.80                  | 0.05                  | 0.44                  | 0.03                  | 0.18                  | 0.27        | 0.15        | 0.00        |
| C <sub>5</sub> H <sub>9</sub> N <sub>2</sub> O <sub>11</sub> S <sup>-</sup> * | 0.00        | 0.00                 | 0.00                  | 0.00                  | 0.00                  | 0.00                  | 0.00                  | 0.00                  | 0.00                  | 0.00        | 0.00        | 0.00        |
| <b>Hydroxyacetone-derived OS</b>                                              |             |                      |                       |                       |                       |                       |                       |                       |                       |             |             |             |
| C <sub>2</sub> H <sub>3</sub> O <sub>5</sub> S <sup>-</sup>                   | 0.49        | 0.01                 | 0.10                  | 0.20                  | 0.13                  | 0.05                  | 0.44                  | 0.24                  | 0.11                  | 0.06        | 0.29        | 0.10        |
| <b>Other tracer</b>                                                           |             |                      |                       |                       |                       |                       |                       |                       |                       |             |             |             |
| Levogluconan                                                                  | 0.00        | 0.01                 | 0.02                  | 0.04                  | 0.00                  | 0.06                  | 0.00                  | 0.02                  | 0.00                  | 0.20        | 0.01        | 0.04        |

17 \* Found only in 6 of 120 filters

18 The correlations in this table are positive.

19 **Table S6.** Correlation ( $r^2$ ) of isoprene-derived SOA tracers and collocated measurements during  
 20 intensive 4 and regular nighttime (8 pm – 7 am next day).

| <b>SOA tracers</b>                                                            | <b>CO</b>   | <b>O<sub>3</sub></b> | <b>NO<sub>x</sub></b> | <b>NO<sub>y</sub></b> | <b>SO<sub>2</sub></b> | <b>NH<sub>3</sub></b> | <b>SO<sub>4</sub></b> | <b>NO<sub>3</sub></b> | <b>NH<sub>4</sub></b> | <b>OC</b>   | <b>WSOC</b> | <b>pH</b>   |
|-------------------------------------------------------------------------------|-------------|----------------------|-----------------------|-----------------------|-----------------------|-----------------------|-----------------------|-----------------------|-----------------------|-------------|-------------|-------------|
| <b>MAE/HMML-derived SOA tracers</b>                                           | <b>0.35</b> | <b>0.08</b>          | <b>0.18</b>           | <b>0.21</b>           | <b>0.17</b>           | <b>0.39</b>           | <b>0.48</b>           | <b>0.15</b>           | <b>0.42</b>           | <b>0.53</b> | <b>0.15</b> | <b>0.01</b> |
| 2-methylglyceric acid                                                         | 0.18        | 0.00                 | 0.13                  | 0.10                  | 0.12                  | 0.18                  | 0.17                  | 0.05                  | 0.22                  | 0.17        | 0.01        | 0.04        |
| MAE-derived OS                                                                | 0.35        | 0.14                 | 0.15                  | 0.17                  | 0.11                  | 0.32                  | 0.51                  | 0.17                  | 0.36                  | 0.58        | 0.20        | 0.00        |
| <b>IEPOX-derived SOA tracers</b>                                              | <b>0.10</b> | <b>0.10</b>          | <b>0.02</b>           | <b>0.03</b>           | <b>0.08</b>           | <b>0.10</b>           | <b>0.37</b>           | <b>0.02</b>           | <b>0.30</b>           | <b>0.27</b> | <b>0.15</b> | <b>0.00</b> |
| 2-methylerythritol                                                            | 0.02        | 0.12                 | 0.00                  | 0.00                  | 0.05                  | 0.01                  | 0.23                  | 0.00                  | 0.20                  | 0.14        | 0.09        | 0.00        |
| 2-methylthreitol                                                              | 0.06        | 0.09                 | 0.00                  | 0.01                  | 0.09                  | 0.05                  | 0.38                  | 0.01                  | 0.30                  | 0.21        | 0.15        | 0.00        |
| (E)-2-methylbut-3-ene-1,2,4-triol                                             | 0.09        | 0.08                 | 0.02                  | 0.03                  | 0.10                  | 0.10                  | 0.35                  | 0.03                  | 0.28                  | 0.26        | 0.11        | 0.00        |
| (Z)-2-methylbut-3-ene-1,2,4-triol                                             | 0.07        | 0.07                 | 0.01                  | 0.02                  | 0.10                  | 0.07                  | 0.32                  | 0.02                  | 0.27                  | 0.22        | 0.08        | 0.00        |
| 2-methylbut-3-ene-1,2,3-triol                                                 | 0.02        | 0.05                 | 0.00                  | 0.01                  | 0.03                  | 0.02                  | 0.18                  | 0.01                  | 0.16                  | 0.15        | 0.09        | 0.00        |
| IEPOX-derived OS                                                              | 0.17        | 0.10                 | 0.08                  | 0.10                  | 0.01                  | 0.16                  | 0.27                  | 0.03                  | 0.21                  | 0.31        | 0.14        | 0.01        |
| IEPOX dimer                                                                   | 0.00        | 0.00                 | 0.00                  | 0.00                  | 0.00                  | 0.00                  | 0.00                  | 0.00                  | 0.00                  | 0.00        | 0.00        | 0.00        |
| <b>Other isoprene SOA tracers</b>                                             |             |                      |                       |                       |                       |                       |                       |                       |                       |             |             |             |
| <b>GA sulfate</b>                                                             |             |                      |                       |                       |                       |                       |                       |                       |                       |             |             |             |
| C <sub>2</sub> H <sub>3</sub> O <sub>6</sub> S <sup>-</sup>                   | 0.12        | 0.22                 | 0.02                  | 0.04                  | 0.04                  | 0.14                  | 0.28                  | 0.01                  | 0.15                  | 0.31        | 0.26        | 0.01        |
| Methylglyoxal-derived OS                                                      |             |                      |                       |                       |                       |                       |                       |                       |                       |             |             |             |
| C <sub>3</sub> H <sub>5</sub> O <sub>6</sub> S <sup>-</sup>                   | 0.16        | 0.05                 | 0.03                  | 0.05                  | 0.00                  | 0.18                  | 0.19                  | 0.01                  | 0.17                  | 0.26        | 0.24        | 0.00        |
| <b>Isoprene-derived OSs</b>                                                   |             |                      |                       |                       |                       |                       |                       |                       |                       |             |             |             |
| C <sub>5</sub> H <sub>7</sub> O <sub>7</sub> S <sup>-</sup>                   | 0.12        | 0.15                 | 0.01                  | 0.02                  | 0.02                  | 0.09                  | 0.22                  | 0.01                  | 0.11                  | 0.17        | 0.12        | 0.00        |
| C <sub>5</sub> H <sub>10</sub> NO <sub>9</sub> S <sup>-</sup>                 | 0.20        | 0.00                 | 0.11                  | 0.12                  | 0.08                  | 0.21                  | 0.39                  | 0.18                  | 0.33                  | 0.30        | 0.09        | 0.00        |
| C <sub>5</sub> H <sub>9</sub> N <sub>2</sub> O <sub>11</sub> S <sup>-</sup> * | 0.00        | 0.00                 | 0.00                  | 0.00                  | 0.00                  | 0.00                  | 0.00                  | 0.00                  | 0.00                  | 0.00        | 0.00        | 0.00        |
| <b>Hydroxyacetone-derived OS</b>                                              |             |                      |                       |                       |                       |                       |                       |                       |                       |             |             |             |
| C <sub>2</sub> H <sub>3</sub> O <sub>5</sub> S <sup>-</sup>                   | 0.89        | 0.09                 | 0.83                  | 0.89                  | 0.30                  | 0.83                  | 0.00                  | 0.00                  | 0.17                  | 0.40        | 0.59        | 0.01        |
| <b>Other tracer</b>                                                           |             |                      |                       |                       |                       |                       |                       |                       |                       |             |             |             |
| Levogluconan                                                                  | 0.23        | 0.00                 | 0.22                  | 0.24                  | 0.08                  | 0.21                  | 0.13                  | 0.01                  | 0.18                  | 0.25        | 0.11        | 0.00        |

21 \* Found only in 6 of 120 filters

22 The correlations in this table are positive.

23 **Table S7.** Regression and correlation ( $r^2$ ) analysis at the 95% confidence interval

|                                                                    | Variables                 |                     | Regression Statistics  |            |        |                |                | <i>p-value</i> |
|--------------------------------------------------------------------|---------------------------|---------------------|------------------------|------------|--------|----------------|----------------|----------------|
|                                                                    | Y                         | x                   | Number of observations | Multiple r | $r^2$  | Adjusted $r^2$ | Standard error |                |
| Nighttime:<br>MAE/HMML-derived SOA<br>vs P[NO <sub>3</sub> ]       | MAE/HMML -<br>derived SOA | P[NO <sub>3</sub> ] | 40                     | 0.7532     | 0.5673 | 0.5559         | 12.5098        | 2.05E-08       |
| Nighttime:<br>IEPOX-derived SOA vs<br>P[NO <sub>3</sub> ]          | IEPOX-derived<br>SOA      | P[NO <sub>3</sub> ] | 40                     | 0.5086     | 0.2587 | 0.2392         | 393.7399       | 8.05E-04       |
| Regular day sampling:<br>MAE/HMML-derived SOA<br>vs O <sub>3</sub> | MAE/HMML -<br>derived SOA | O <sub>3</sub>      | 30                     | 0.8457     | 0.7153 | 0.7051         | 8.9517         | 4.00E-09       |
| Daytime:<br>2-methyltetrols vs O <sub>3</sub>                      | 2-methyltetrols           | O <sub>3</sub>      | 64                     | 0.3610     | 0.1303 | 0.1163         | 254.4175       | 3.39E-03       |
| Intensive 3:<br>MAE/HMML-derived SOA<br>vs O <sub>3</sub>          | MAE/HMML -<br>derived SOA | O <sub>3</sub>      | 15                     | 0.6844     | 0.4683 | 0.4274         | 18.3128        | 4.89E-03       |
| Intensive 3:<br>2-methyltetrols vs O <sub>3</sub>                  | 2-methyltetrols           | O <sub>3</sub>      | 15                     | 0.5844     | 0.3415 | 0.2908         | 259.0249       | 2.22E-02       |
| MAE/HMML-derived SOA<br>vs SO <sub>4</sub>                         | MAE/HMML -<br>derived SOA | SO <sub>4</sub>     | 117                    | 0.5779     | 0.3340 | 0.3282         | 15.8648        | 8.96E-12       |
| IEPOX-derived SOA vs SO <sub>4</sub>                               | IEPOX-derived<br>SOA      | SO <sub>4</sub>     | 117                    | 0.6027     | 0.3632 | 0.3577         | 310.4400       | 6.51E-13       |

24



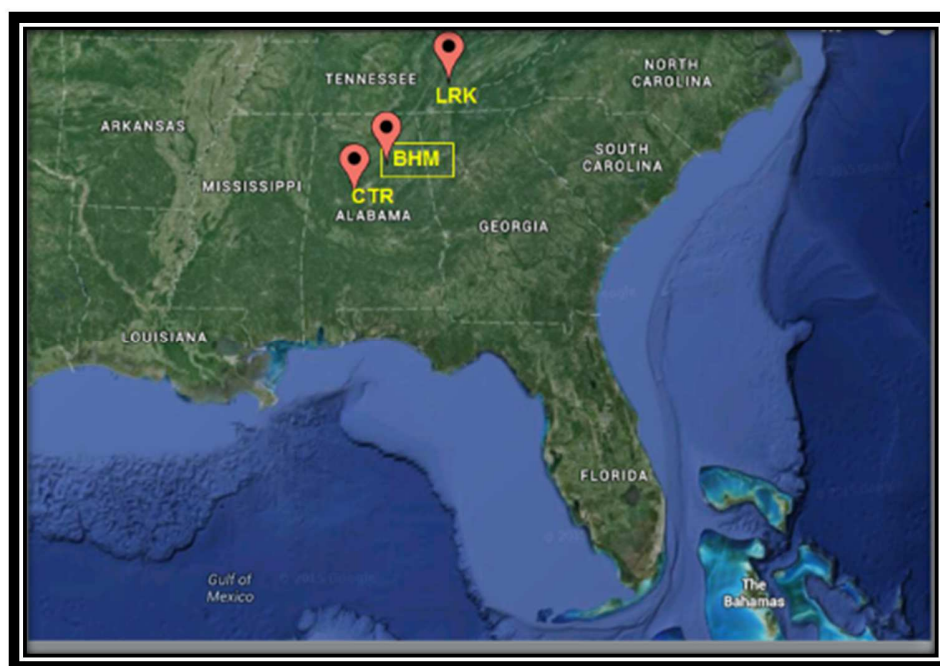

25  
26  
27  
28  
29  
30  
31  
32  
33

34 **Figure S1.** The locations of the three sampling sites during 2013 SOAS: BHM, CTR, and LRK.  
35 BHM was the focused site in this study.

36  
37  
38  
39  
40  
41  
42  
43  
44  
45  
46  
47

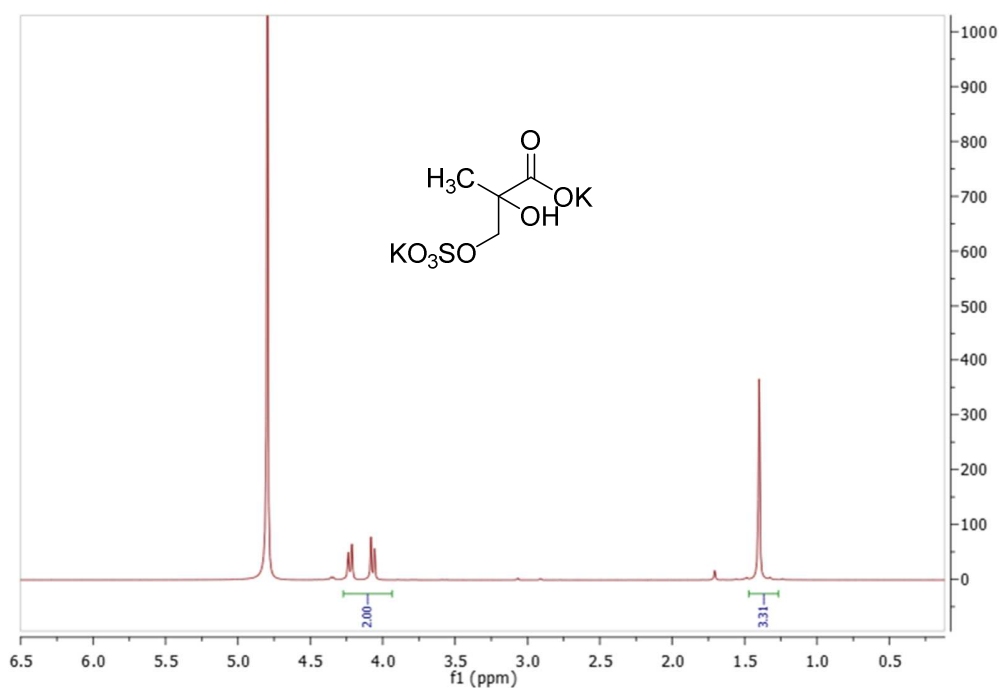

48 **Figure S2.** <sup>1</sup>H NMR (400 MHz, D<sub>2</sub>O) of the MAE/HMML-derived OS.

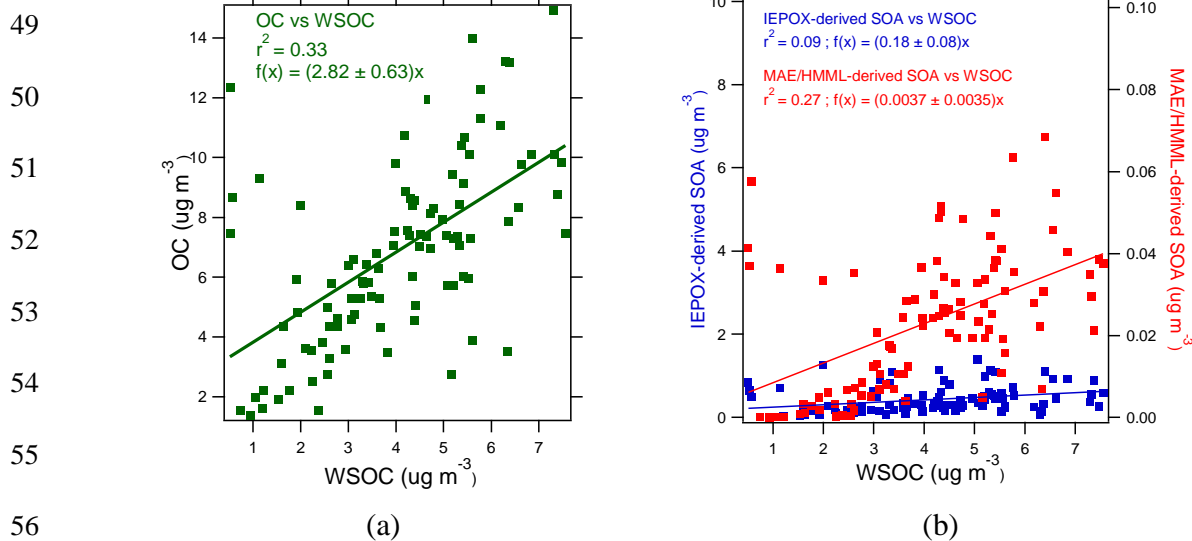

57 **Figure S3.** (a) Comparison of organic carbon (OC) and water soluble organic carbon (WSOC),  
 58 suggesting that 35% of OC at BHM was WSOC. (b) Comparison of IEPOX- and MAE/HMML-  
 59 derived SOA tracers with WSOC, indicating that IEPOX- and MAE/HMML-derived SOA tracers  
 60 explained 18 and 0.4% of the WSOC, respectively.

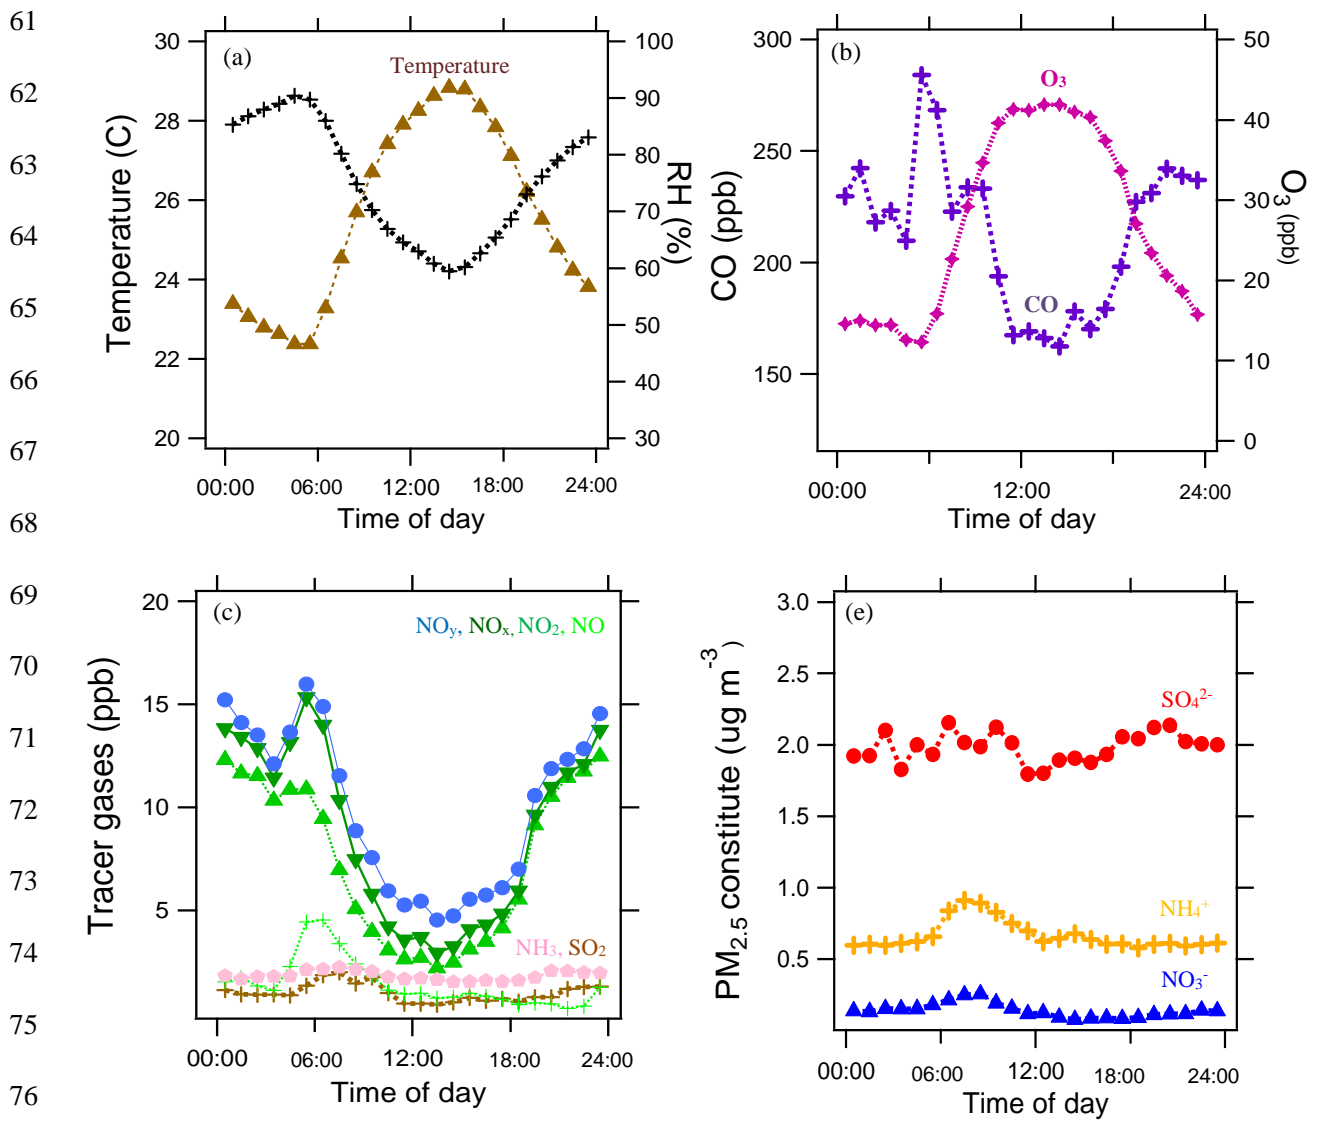

77 **Figure S4.** Diurnal variations of (a) meteorology, (b) O<sub>3</sub> and CO, (c) NO<sub>y</sub>, NO, NO<sub>2</sub>, and NO<sub>x</sub>,  
 78 and (d) PM<sub>2.5</sub> constituents at BHM during the 2013 SOAS campaign. High temperature and low  
 79 RH were observed at 2-4 pm local time. O<sub>3</sub> reached its maximum, while CO dropped to its  
 80 minimum in early afternoon. NO<sub>x</sub> and NO<sub>y</sub> were high during early morning hours and declined in  
 81 the afternoon due to photochemical processes. No significant diurnal variation was observed for  
 82 NH<sub>3</sub>, SO<sub>2</sub>, SO<sub>4</sub><sup>2-</sup>, NH<sub>4</sub><sup>+</sup>, and NO<sub>3</sub><sup>-</sup>.
